# Supplementary material for: Pollution and Ecological Risk Evaluation of Heavy Metals in the Soil and Sediment around the HTM Tailings Pond, Northeastern China
Source: MDPI journal article supplement (doi:10.3390/ijerph17197072), 2020-09-27
Supplement: s1 [file s1]

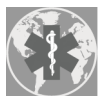

*Supplementary Data*

## **Pollution and Ecological Risk Evaluation of Heavy Metals in the Soil and Sediment around the HTM tailings pond, Northeastern China**

**Table S1.** Basic physicochemical properties of tailings in 0-100 cm depth.

| <b>Test Items</b>         | <b>Tailings</b> |
|---------------------------|-----------------|
| pH                        | 3.2 - 4.5       |
| Cu (mg kg <sup>-1</sup> ) | 408 - 1397      |
| Pb (mg kg <sup>-1</sup> ) | 143 - 211       |
| Zn (mg kg <sup>-1</sup> ) | 2985 - 5940     |
| Cd (mg kg <sup>-1</sup> ) | 5.2 - 13.7      |
| Cr (mg kg <sup>-1</sup> ) | 14.2 - 24.3     |
